# Supplementary material
Source: PubMed Central journal article supplement (PMC4195534)
Supplement: Supp_Figure1.pdf [file Supp_Figure1.pdf]

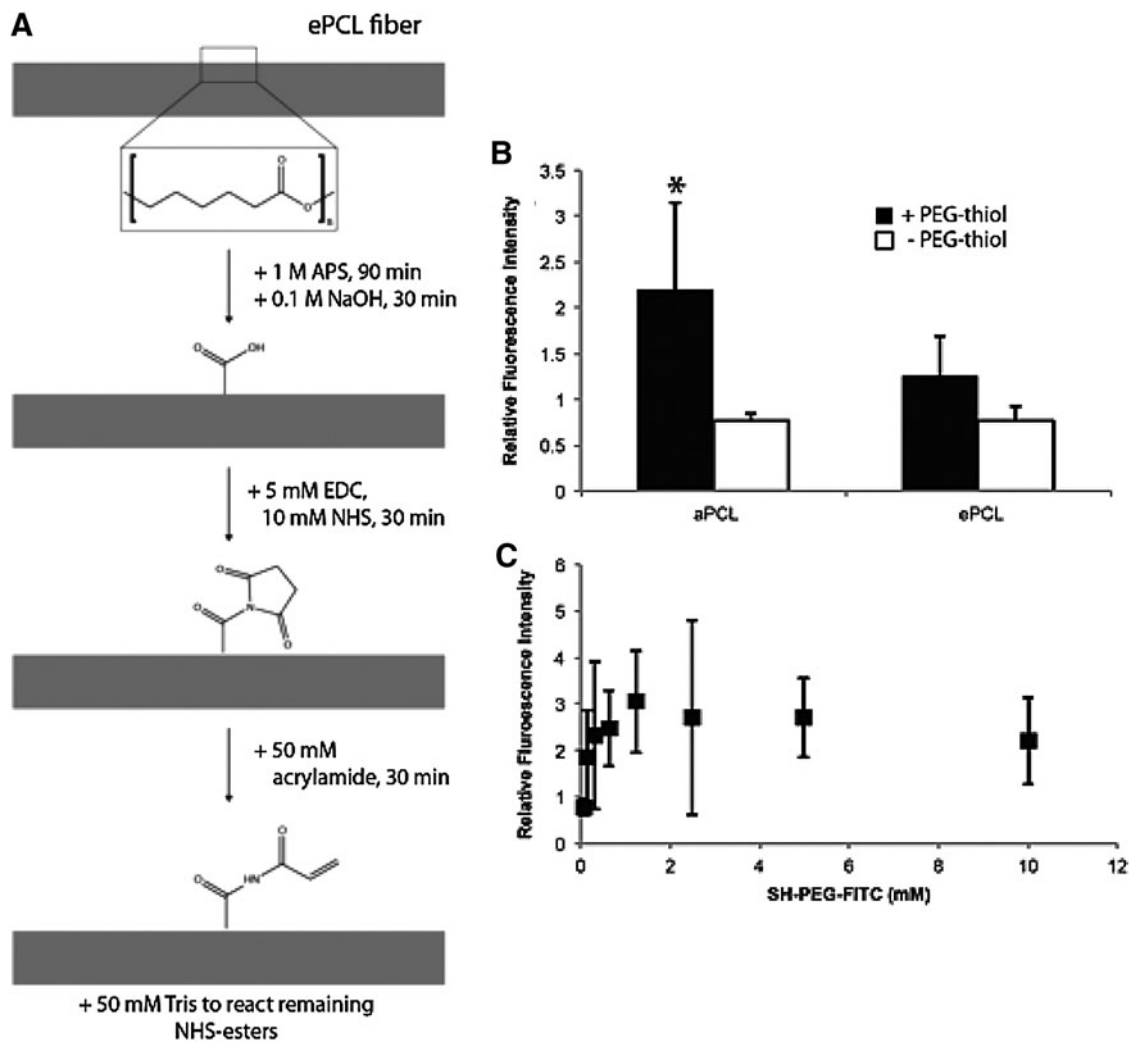

**SUPPLEMENTARY FIG. S1.** (A) The fabrication process of aPCL. ePCL was first rendered hydrophilic and alkali digested to expose carboxyl groups. 1-Ethyl-3-[3-dimethylaminopropyl]carbodiimide hydrochloride (EDC) and N-hydroxysuccinimide (NHS) were used to crosslink amine-reactive NHS-esters to the carboxyl group. The scaffold was then mixed with acrylamide to fully convert carboxyl groups to acrylate groups, with Tris used to react any remaining NHS-esters. (B) The fluorescence intensity of aPCL and unmodified ePCL with and without 10 mM fluorescently tagged PEG-thiol. There is a significant difference in intensity between aPCL with PEG-thiol and the other groups, demonstrating that aPCL was successfully acrylated. \* $p < 0.05$  versus the other groups. (C) Fluorescent intensity as a function of PEG-thiol concentration, which demonstrated a logarithmic trend ( $r^2 = 0.463$ ,  $p = 0.008$ ) and seemed to saturate at 1.25 mM. Error bars represent standard deviation.
